# Supplementary material for: Activated carbonates: enabling the synthesis of differentiated polycarbonate resins via melt transcarbonation
Source: Royal Society of Chemistry journal article supplement (doi:10.1039/c6py00925e), 2016-01-01
Supplement: c6py00925e1.pdf [file c6py00925e1.pdf]

Activated carbonates: enabling the synthesis of differentiated polycarbonate resins via melt  
transcarbonation

J.H. Kamps <sup>a, b, \*</sup>, T. Hoeks <sup>a</sup>, E. Kung <sup>a, c</sup>, J.P. Lens <sup>a, d</sup>, P. J. McCloskey <sup>e</sup>, B.A.J. Noordover <sup>b</sup>, J.P.A. Heuts <sup>b</sup>

**Supporting information**

**Table S1** DPC model compound reaction results, following formation of HP and DiOPC vs time

| time |       | [PCP] | [OctylPh] | [DPCPC] | [HP]  | [DiOPC] |
|------|-------|-------|-----------|---------|-------|---------|
| sec  | mm:ss | mol/l | mol/l     | mol/l   | mol/l | mol/l   |
| 0    | 00:00 | 0     | 2.3       | 1.1     | 0     | 0       |
| 120  | 02:00 | 0.2   | 2.15      | 0.98    | 0.15  | 0.015   |
| 240  | 04:00 | 0.32  | 2.01      | 0.85    | 0.27  | 0.03    |
| 420  | 07:00 | 0.45  | 1.8       | 0.7     | 0.4   | 0.06    |
| 600  | 10:00 | 0.55  | 1.7       | 0.6     | 0.45  | 0.08    |
| 900  | 15:00 | 0.72  | 1.55      | 0.5     | 0.52  | 0.12    |
| 1200 | 20:00 | 0.82  | 1.45      | 0.43    | 0.55  | 0.15    |
| 1500 | 25:00 | 0.91  | 1.4       | 0.4     | 0.58  | 0.18    |
| 1800 | 30:00 | 1     | 1.35      | 0.35    | 0.59  | 0.2     |
| 2100 | 35:00 | 1.05  | 1.25      | 0.325   | 0.6   | 0.23    |
| 2400 | 40:00 | 1.14  | 1.17      | 0.29    | 0.6   | 0.27    |

**Table S2** BMSC model compound reaction results, following formation of HP and DiOPC vs time

| time |       | [MS]  | [OctylPh] | [BMSC] | [HP]  | [DiOPC] |
|------|-------|-------|-----------|--------|-------|---------|
| sec  | mm:ss | mol/l | mol/l     | mol/l  | mol/l | mol/l   |
| 0    | 00:00 | 0     | 2.7       | 1.3    | 0     | 0       |
| 15   | 00:15 | 0.4   | 2.25      | 0.85   | 0.4   | 0.03    |
| 30   | 00:30 | 0.75  | 1.95      | 0.6    | 0.9   | 0.06    |
| 45   | 00:45 | 0.95  | 1.75      | 0.4    | 0.98  | 0.09    |
| 60   | 01:00 | 1.12  | 1.6       | 0.3    | 1.02  | 0.12    |
| 100  | 01:40 | 1.35  | 1.4       | 0.15   | 1.02  | 0.18    |
| 140  | 02:20 | 1.48  | 1.2       | 0.09   | 0.95  | 0.25    |
| 180  | 03:00 | 1.6   | 1.08      | 0.05   | 0.9   | 0.33    |
| 260  | 04:20 | 1.75  | 0.9       | 0.02   | 0.8   | 0.45    |
| 360  | 06:00 | 1.9   | 0.75      | 0.015  | 0.7   | 0.6     |
| 480  | 08:00 | 2.05  | 0.65      | 0.012  | 0.6   | 0.72    |
| 600  | 10:00 | 2.15  | 0.55      | 0.008  | 0.52  | 0.8     |
| 780  | 13:00 | 2.25  | 0.45      | 0.005  | 0.4   | 0.9     |
| 960  | 16:00 | 2.3   | 0.35      | 0.004  | 0.3   | 1       |
| 1200 | 20:00 | 2.35  | 0.3       | 0.002  | 0.25  | 1.1     |
| 1500 | 25:00 | 2.41  | 0.28      | 0.0018 | 0.2   | 1.13    |
